# Supplementary material
Source: ML conference proceedings conference paper supplement (https://proceedings.mlr.press/v70/hu17a.html)
Supplement: Supplementary file 1 [file hu17a-supp.pdf]

## Supplementary Material

We will make use of the following result throughout this section.

**Proposition S1** *Suppose  $f$  is  $L$ -smooth and  $m$ -strongly convex. Then for all  $x, y$  the following inequalities hold.*

$$f(x) - f(y) \geq \nabla f(y)^\top (x - y) + \frac{m}{2} \|x - y\|^2 \quad (\text{S1})$$

$$f(y) - f(x) \geq \nabla f(y)^\top (y - x) - \frac{L}{2} \|y - x\|^2 \quad (\text{S2})$$

**Proof.** These inequalities follow from the definitions of  $L$ -smoothness and  $m$ -strong convexity. ■

### A. Proof of Lemma 3

Applying (S1) with  $(x, y) \mapsto (x_k, y_k)$ , we obtain

$$f(x_k) - f(y_k) \geq \nabla f(y_k)^\top (x_k - y_k) + \frac{m}{2} \|x_k - y_k\|^2.$$

Applying (S2) with  $(x, y) \mapsto (y_k - \alpha \nabla f(y_k), y_k)$ , we obtain

$$f(y_k) - f(y_k - \alpha \nabla f(y_k)) \geq \frac{\alpha}{2} (2 - L\alpha) \|\nabla f(y_k)\|^2.$$

Summing these inequalities, we obtain:

$$f(x_k) - f(y_k - \alpha \nabla f(y_k)) \geq \nabla f(y_k)^\top (x_k - y_k) + \frac{m}{2} \|x_k - y_k\|^2 + \frac{\alpha}{2} (2 - L\alpha) \|\nabla f(y_k)\|^2. \quad (\text{S3})$$

Substituting  $x_{k+1} = y_k - \alpha \nabla f(y_k)$  in the left-hand side of (S3), we can rewrite it as

$$\frac{1}{2} \begin{bmatrix} x_k - y_k \\ \nabla f(y_k) \end{bmatrix}^\top \left( \begin{bmatrix} m & 1 \\ 1 & \alpha(2 - L\alpha) \end{bmatrix} \otimes I_p \right) \begin{bmatrix} x_k - y_k \\ \nabla f(y_k) \end{bmatrix} \leq f(x_k) - f(x_{k+1}). \quad (\text{S4})$$

Substituting  $y_k = (1 + \beta)x_k - \beta x_{k-1}$  into (S4), we obtain

$$\frac{1}{2} \begin{bmatrix} x_k - x_\star \\ x_{k-1} - x_\star \\ \nabla f(y_k) \end{bmatrix}^\top \left( \begin{bmatrix} \beta^2 m & -\beta^2 m & -\beta \\ -\beta^2 m & \beta^2 m & \beta \\ -\beta & \beta & \alpha(2 - L\alpha) \end{bmatrix} \otimes I_p \right) \begin{bmatrix} x_k - x_\star \\ x_{k-1} - x_\star \\ \nabla f(y_k) \end{bmatrix} \leq f(x_k) - f(x_{k+1}),$$

which directly leads to the formulation of  $\tilde{X}_1$  in Lemma 3. Similarly, we apply (S1) with  $(x, y) \mapsto (x_\star, y_k)$  and obtain

$$\frac{1}{2} \begin{bmatrix} x_k - x_\star \\ x_{k-1} - x_\star \\ \nabla f(y_k) \end{bmatrix}^\top \left( \begin{bmatrix} (1 + \beta)^2 m & -\beta(1 + \beta)m & -(1 + \beta) \\ -\beta(1 + \beta)m & \beta^2 m & \beta \\ -(1 + \beta) & \beta & \alpha(2 - L\alpha) \end{bmatrix} \otimes I_p \right) \begin{bmatrix} x_k - x_\star \\ x_{k-1} - x_\star \\ \nabla f(y_k) \end{bmatrix} \leq f(x_\star) - f(x_{k+1})$$

which directly leads to the formulation of  $\tilde{X}_2$  in Lemma 3. The rest of the proof is straightforward. Actually, we can choose  $\tilde{X} := \rho^2 \tilde{X}_1 + (1 - \rho^2) \tilde{X}_2$  and we directly obtain

$$\begin{bmatrix} x_k - x_\star \\ x_{k-1} - x_\star \\ \nabla f(y_k) \end{bmatrix}^\top \left( \tilde{X} \otimes I_p \right) \begin{bmatrix} x_k - x_\star \\ x_{k-1} - x_\star \\ \nabla f(y_k) \end{bmatrix} \leq -(f(x_{k+1}) - f(x_\star)) + \rho^2 (f(x_k) - f(x_\star)).$$

Specifically,  $\tilde{X}$  may be computed as

$$\tilde{X} = \frac{1}{2} \begin{bmatrix} (1 + \beta)^2 m - (1 + 2\beta)m\rho^2 & (\rho^2 - 1 - \beta)\beta m & \rho^2 - 1 - \beta \\ (\rho^2 - 1 - \beta)\beta m & \beta^2 m & \beta \\ \rho^2 - 1 - \beta & \beta & \alpha(2 - L\alpha) \end{bmatrix}.$$

■

## B. Proof of Lemma 5

Applying (S2) with  $(x, y) \mapsto (x_{k+1}, y_k)$ , and making the substitutions  $x_{k+1} = (1 + \beta)x_k - \beta x_{k-1} - \alpha \nabla f(y_k)$  and  $y_k = (1 + \eta)x_k - \eta x_{k-1}$ , we obtain:

$$\begin{aligned}
 f(y_k) - f(x_{k+1}) &\geq \nabla f(y_k)^\top (y_k - x_{k+1}) - \frac{L}{2} \|x_{k+1} - y_k\|^2 \\
 &= \nabla f(y_k)^\top ((\beta - \eta)(x_{k-1} - x_k) + \alpha \nabla f(y_k)) - \frac{L}{2} \|(\beta - \eta)(x_{k-1} - x_k) + \alpha \nabla f(y_k)\|^2 \\
 &= \frac{1}{2} \begin{bmatrix} x_k - x_\star \\ x_{k-1} - x_\star \\ \nabla f(y_k) \end{bmatrix}^\top \left( \begin{bmatrix} -L(\beta - \eta)^2 & L(\beta - \eta)^2 & -(1 - L\alpha)(\beta - \eta) \\ L(\beta - \eta)^2 & -L(\beta - \eta)^2 & (1 - L\alpha)(\beta - \eta) \\ -(1 - L\alpha)(\beta - \eta) & (1 - L\alpha)(\beta - \eta) & \alpha(2 - L\alpha) \end{bmatrix} \otimes I_p \right) \begin{bmatrix} x_k - x_\star \\ x_{k-1} - x_\star \\ \nabla f(y_k) \end{bmatrix} \quad (\text{S5})
 \end{aligned}$$

Applying (S1) with  $(x, y) \mapsto (x_k, y_k)$  and substituting  $y_k = (1 + \eta)x_k - \eta x_{k-1}$ , we obtain:

$$\begin{aligned}
 f(x_k) - f(y_k) &\geq \nabla f(y_k)^\top (x_k - y_k) + \frac{m}{2} \|x_k - y_k\|^2 \\
 &= \eta \nabla f(y_k)^\top (x_{k-1} - x_k) + \frac{m\eta^2}{2} \|x_{k-1} - x_k\|^2 \\
 &= \frac{1}{2} \begin{bmatrix} x_k - x_\star \\ x_{k-1} - x_\star \\ \nabla f(y_k) \end{bmatrix}^\top \left( \begin{bmatrix} \eta^2 m & -\eta^2 m & -\eta \\ -\eta^2 m & \eta^2 m & \eta \\ -\eta & \eta & 0 \end{bmatrix} \otimes I_p \right) \begin{bmatrix} x_k - x_\star \\ x_{k-1} - x_\star \\ \nabla f(y_k) \end{bmatrix} \quad (\text{S6})
 \end{aligned}$$

Applying (S1) with  $(x, y) \mapsto (x_\star, y_k)$  and again substituting  $y_k = (1 + \eta)x_k - \eta x_{k-1}$ , we obtain:

$$\begin{aligned}
 f(x_\star) - f(y_k) &\geq \nabla f(y_k)^\top (x_\star - y_k) + \frac{m}{2} \|x_\star - y_k\|^2 \\
 &= -\nabla f(y_k)^\top ((1 + \eta)(x_k - x_\star) - \eta(x_{k-1} - x_\star)) + \frac{m}{2} \|(1 + \eta)(x_k - x_\star) - \eta(x_{k-1} - x_\star)\|^2 \\
 &= \frac{1}{2} \begin{bmatrix} x_k - x_\star \\ x_{k-1} - x_\star \\ \nabla f(y_k) \end{bmatrix}^\top \left( \begin{bmatrix} (1 + \eta)^2 m & -\eta(1 + \eta)m & -(1 + \eta) \\ -\eta(1 + \eta)m & \eta^2 m & \eta \\ -(1 + \eta) & \eta & 0 \end{bmatrix} \otimes I_p \right) \begin{bmatrix} x_k - x_\star \\ x_{k-1} - x_\star \\ \nabla f(y_k) \end{bmatrix} \quad (\text{S7})
 \end{aligned}$$

By adding (S5)–(S7) with the definitions of  $\tilde{X}_1$ ,  $\tilde{X}_2$ , and  $\tilde{X}_3$  in Lemma 5, we obtain:

$$\begin{aligned}
 \begin{bmatrix} x_k - x_\star \\ x_{k-1} - x_\star \\ \nabla f(y_k) \end{bmatrix}^\top \left( (\tilde{X}_1 + \tilde{X}_2) \otimes I_p \right) \begin{bmatrix} x_k - x_\star \\ x_{k-1} - x_\star \\ \nabla f(y_k) \end{bmatrix} &\leq f(x_k) - f(x_{k+1}) \\
 \begin{bmatrix} x_k - x_\star \\ x_{k-1} - x_\star \\ \nabla f(y_k) \end{bmatrix}^\top \left( (\tilde{X}_1 + \tilde{X}_3) \otimes I_p \right) \begin{bmatrix} x_k - x_\star \\ x_{k-1} - x_\star \\ \nabla f(y_k) \end{bmatrix} &\leq f(x_\star) - f(x_{k+1})
 \end{aligned}$$

The rest of the proof follows by substituting above expressions into the weighted sum with  $\rho^2$ . ■

## C. Proof of Lemma 8

Since  $f$  is  $L$ -smooth and convex, we can use the same proof technique as in Lemma 3 while setting  $m = 0$  and  $\alpha = \frac{1}{L}$ . We can thus obtain the following inequalities that parallel (S4).

$$\begin{aligned}
 \frac{1}{2} \begin{bmatrix} y_k - x_k \\ \nabla f(y_k) \end{bmatrix}^\top \left( \begin{bmatrix} 0 & 1 \\ 1 & -\frac{1}{L} \end{bmatrix} \otimes I_p \right) \begin{bmatrix} y_k - x_k \\ \nabla f(y_k) \end{bmatrix} &\geq f(x_{k+1}) - f(x_k) \\
 \frac{1}{2} \begin{bmatrix} y_k - x_\star \\ \nabla f(y_k) \end{bmatrix}^\top \left( \begin{bmatrix} 0 & 1 \\ 1 & -\frac{1}{L} \end{bmatrix} \otimes I_p \right) \begin{bmatrix} y_k - x_\star \\ \nabla f(y_k) \end{bmatrix} &\geq f(x_{k+1}) - f(x_\star)
 \end{aligned}$$

The conclusion of Lemma 8 follows once we substitute  $y_k = (1 - \beta_k)x_k + \beta_k x_{k-1}$ . ■
